# Supplementary material for: Molecular analysis of circulating tumor cells identifies distinct copy-number profiles in patients with chemosensitive and chemorefractory small-cell lung cancer
Source: Springer Nature journal article supplement (doi:10.1038/nm.4239), 2016-11-21
Supplement: 41591_2017_BFnm4239_MOESM17_ESM.pdf [file 41591_2017_BFnm4239_MOESM17_ESM.pdf]

## Supplementary Figure Legends

**Figure S1.** Chemorefractory disease is defined as that of patients who progress within 90 days of completion of chemotherapy. Chemosensitive disease is defined as that of patients who progress more than 90 days after the completion of chemotherapy. Chemorefractory disease may be thought of as intrinsic drug resistance whilst the relapse of initially chemosensitive disease is associated with acquired drug resistance. However, chemorefractory and chemosensitive disease refer to the clinical criteria above and intrinsic and acquired drug resistance refer to molecular mechanisms of drug resistance that are incompletely understood in SCLC.

**Figure S2.** Schematic overview of the bioinformatics development and validation of a copy number profile-based signature predictive of chemo-response. Paired-end sequence reads from the training set (88 CTCs) and CTC Testing set (112 CTCs) were aligned to the human reference genome using BWA. For the CDX Testing set (nine CDX samples), a two-step strategies was adopted to remove potentially contaminating mouse reads. First, sequencing reads were aligned independently to the human and mouse genomes, and then reads that cross-aligned to both genomes were discarded before downstream analysis. Copy number changes in both training and validation sets were determined using CONTROL-FREEC. Predictive features that discriminated between chemosensitive and chemorefractory samples in the training cohort were identified using LIMMA (FDR <1%). Then a Support Vector Machine (SVM)-based classifier was constructed. Model accuracy and stability were estimated using 10-fold cross-validation over 100 iterations. The performance of the classifier was evaluated on samples from the testing CTC set and CDX models.

**Figure S3.** Example of chromosomal copy number profiles generated from five CTCs and a single WBC from a baseline SCLC blood sample. Following isolation and WGA of each sample low-pass WGS data was generated and analysed using CONTROL-FREEC with gains indicated in red and losses indicated in blue (CTC1-CTC5). WBC controls were included for every patient to confirm tumor specific alterations (sWBC).

**Figure S4.** Comparison of all genes showing significant frequencies of gain or loss in Rudin *et al.* SCLC tumor data set (2) vs frequencies observed in 88 baseline CTCs and 20 WBC from 13 SCLC patients. Similar levels of gain and loss were seen between the tumor and CTC samples, with no significant changes seen in the WBC controls.

**Figure S5.** Schematic representation of the chromosomal location of 2281 *loci* within the 16 profiles identified in the CTC CNA classifier. All *loci* within each profile are indicated by a coloured line, with chromosome numbering indicated on the right of the figure. Each profile is represented by a separate colour.

**Figure S6.** Chromosomal copy number changes of nine CDX models derived from two chemorefractory (purple) and four chemosensitive (green) SCLC patients. Areas of chromosomal gains (red) and loss (blue) based on all protein-coding genes are shown. Location of common SCLC deletions (3p, 17p) and amplification (3q, 5p) are indicated by blue and red arrows. The CTC CNA classifier correctly categorised five of the six patient derived CDX tumours (83.3%). CDX sample names are indicated on the left of the figure and chromosomal location across the top of the figure.

## Supplementary Table Legends

**Table ST1.** Demographics detailing disease status, PS, PFS, OS, time to progression from end of 1st line treatment, chemotherapy received and CTC numbers at baseline for all 31 patients and all 6 CDX patient donors. For five patients used in longitudinal study, CTC numbers at relapse are shown. Patients that received thoracic radiotherapy post-chemotherapy response assessment in the absence of progression are indicated with an asterisk. PS = performance status.

**Table ST2.** Details of the 16 profiles used in the CTC CNA classifier of chemosensitive and chemorefractory SCLC after grouping of 2281 informative *loci*. Chromosomally amplified

profiles are shown in red, deleted profiles are shown in blue. The chromosomal location and number of genes associated with each profile are shown. Details of the genes associated with each profile are further detailed in Supplementary Table ST6.

**Table ST3.** Analysis of intra-patient heterogeneity based on the 16 profile CTC CNA classifier for 31 patients. Green = patients correctly called based on CTC CNA classifier, pink = patients incorrectly called based on CTC CNA classifier.

**Table ST4.** CTC CNA classifier associations with clinical characteristics for 31 patients as assessed by Fisher's Exact Test showing no significant associations.

**Table ST5.** Assignment of CTCs samples at baseline and, for initially chemosensitive patients at relapse, based on the CTC CNA classifier. Clinical classification (clinical response) and CTC CNA classification (predicted response) are shown.

**Table ST6.** Excel spread sheet of 2281 *loci* identified in 16 profiles of CTC CNA predictive signature.

# Supplementary Figure S1.

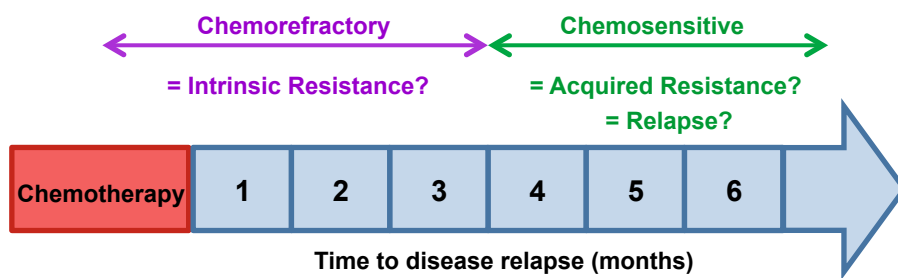

# Supplementary Figure S2.

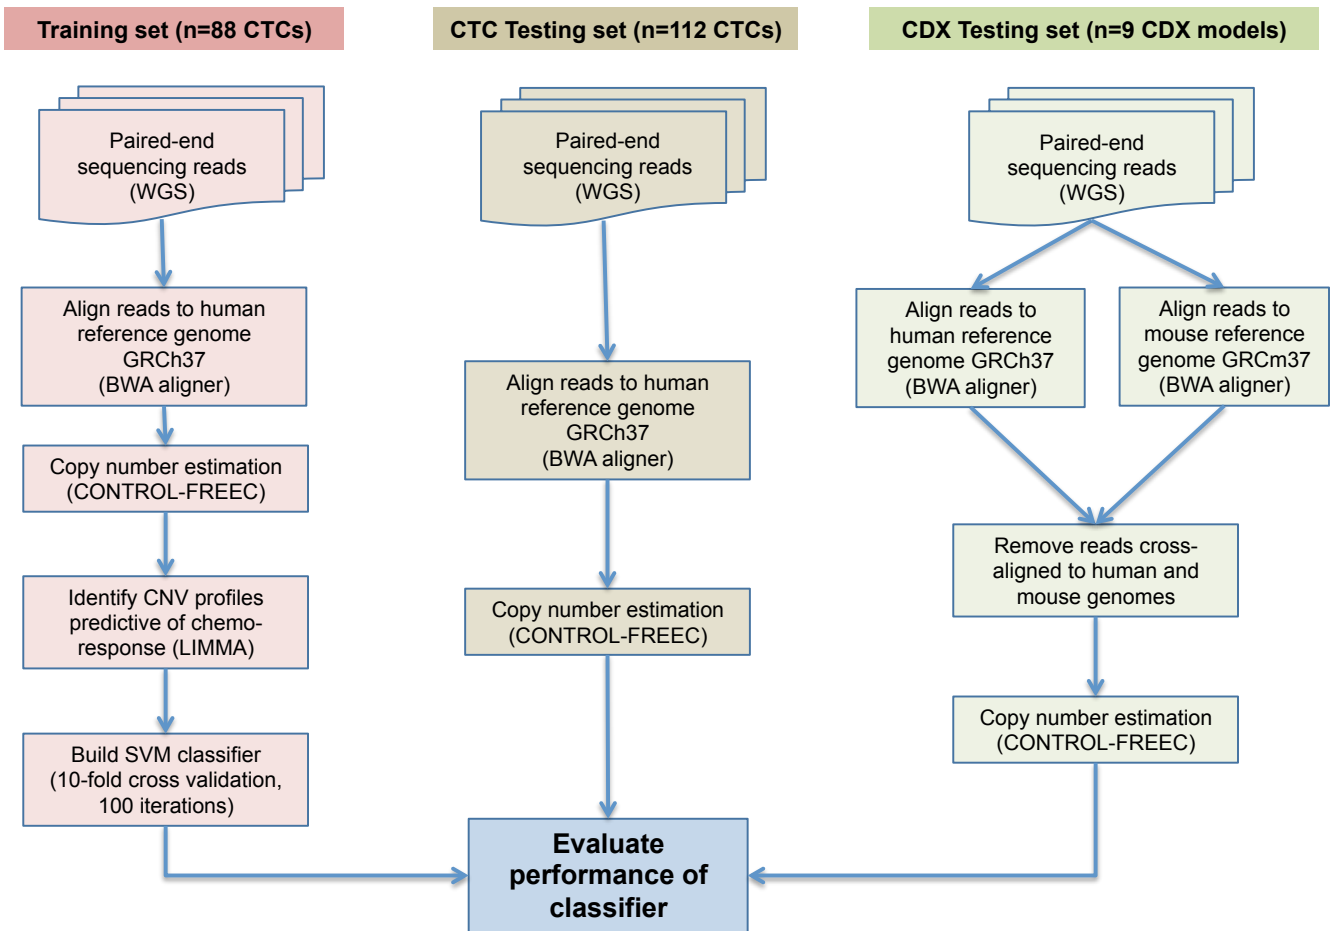

# Supplementary Figure S3.

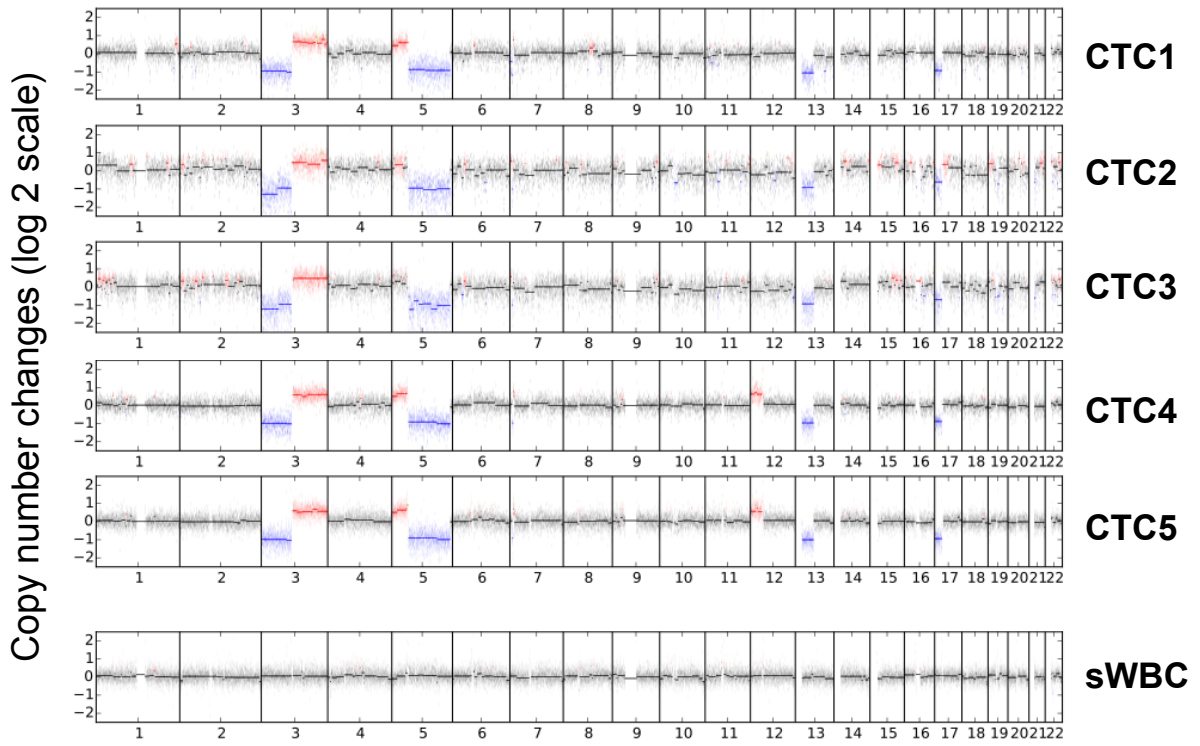

# Supplementary Figure S4.

**Significant gains seen in SCLC**

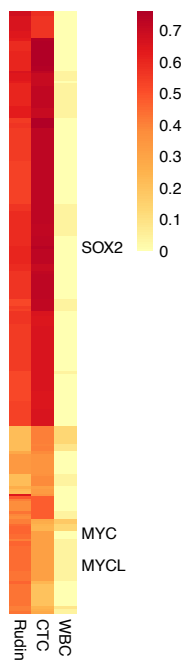

**Significant deletions seen in SCLC**

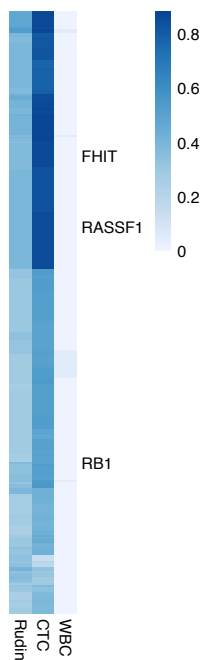

# Supplementary Figure S5.

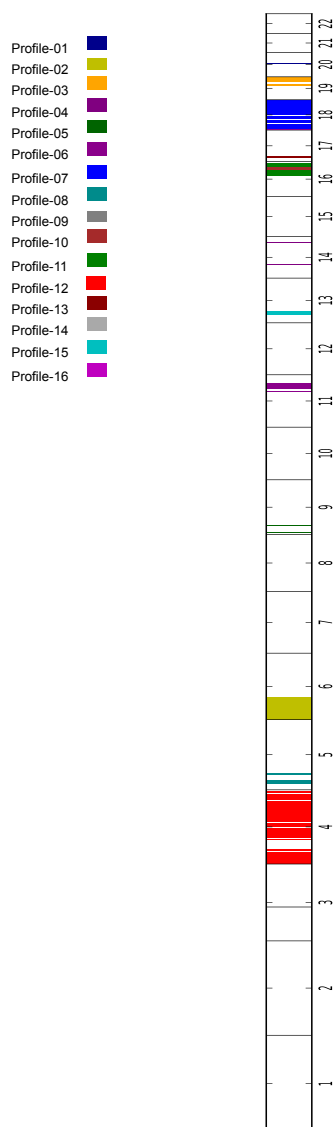



# Supplementary Figure S6.

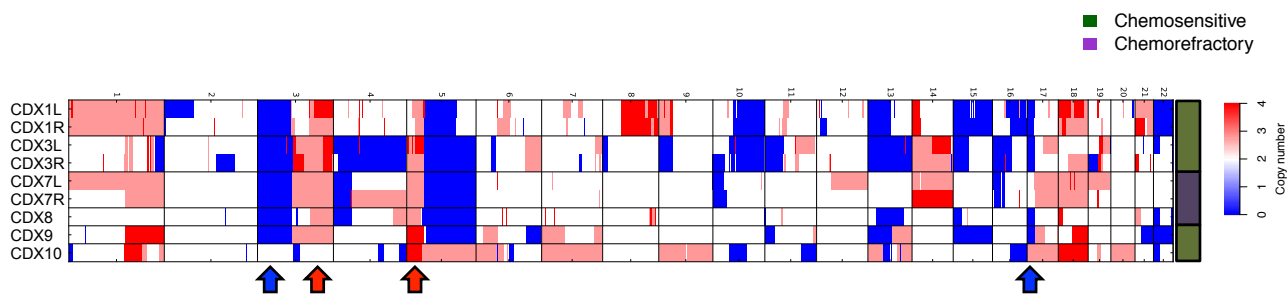

| Patient | Sample | Patient clinical status | Sample CNA Classification | Patient CNA classification | Accuracy    |
|---------|--------|-------------------------|---------------------------|----------------------------|-------------|
| CDX1    | CDX1_L | Sensitive               | Sensitive                 | Sensitive                  | 83.3% (5/6) |
|         | CDX1_R |                         | Sensitive                 |                            |             |
| CDX3    | CDX3_L | Sensitive               | Sensitive                 | Sensitive                  |             |
|         | CDX3_R |                         | Sensitive                 |                            |             |
| CDX7    | CDX7_L | Refractory              | Refractory                | Refractory                 |             |
|         | CDX7_R |                         | Refractory                |                            |             |
| CDX8    | CDX8   | Refractory              | Sensitive                 | Sensitive                  |             |
| CDX9    | CDX9   | Sensitive               | Sensitive                 | Sensitive                  |             |
| CDX10   | CDX10  | Sensitive               | Sensitive                 | Sensitive                  |             |

# Supplementary Table ST1.

| Patient number | Chemosensitive/Chemorefractory | Age | Sex    | Smoking History (pack years)        | PS | Metastatic sites                          | 1st line Chemotherapy      | Lines of Chemotherapy | PFS (months) | OS (months) | Time to progression from end of 1st line treatment | CTC count at baseline | CTC count at Relapse |
|----------------|--------------------------------|-----|--------|-------------------------------------|----|-------------------------------------------|----------------------------|-----------------------|--------------|-------------|----------------------------------------------------|-----------------------|----------------------|
| P1             | Chemosensitive                 | 73  | Male   | 30                                  | 3  | lymph node, bone, adrenal                 | carboplatin                | 1                     | 5.1          | 6.6         | 3.5                                                | 522                   | 1126                 |
| P2             | Chemosensitive                 | 57  | Female | 64                                  | 2  | lymph node, bone, liver                   | carboplatin and etoposide  | 2                     | 8.1          | 14.3        | 6.0                                                | 1200                  | 578                  |
| P3             | Chemosensitive                 | 59  | Male   | 40                                  | 1  | liver, pleural effusion                   | carboplatin and etoposide  | 2                     | 6.2          | 10.5        | 3.8                                                | 250                   | 12                   |
| P4             | Chemosensitive                 | 68  | Female | 67.5                                | 2  | lymph node, liver                         | carboplatin and etoposide  | 3                     | 6.2          | 16.2        | 3.4                                                | 27                    | 289                  |
| P5             | Chemosensitive                 | 63  | Female | 23                                  | 2  | bone, liver                               | carboplatin and etoposide  | 2                     | 6.1          | 7.6         | 3.8                                                | 307                   | 312                  |
| P6             | Chemosensitive                 | 71  | Female | 40                                  | 1  | bone, liver                               | carboplatin and etoposide  | 1                     | 9.5          | 9.6         | 7.4                                                | 836                   | NA                   |
| P7             | Chemosensitive                 | 65  | Male   | 60                                  | 3  | adrenal, lung                             | carboplatin                | 1                     | 5.6          | 6.9         | 3.3                                                | 3780                  | NA                   |
| P8             | Chemorefractory                | 61  | Male   | 90                                  | 1  | lymph node, bone, liver, soft tissue      | carboplatin and etoposide  | 1                     | 2.8          | 4.4         | 0.3                                                | 20815                 | NA                   |
| P9             | Chemorefractory                | 65  | Female | 84                                  | 2  | bone, liver, brain, pleural effusion      | carboplatin and etoposide  | 1                     | 3.1          | 3.5         | 2.2                                                | 1625                  | NA                   |
| P10            | Chemorefractory                | 78  | Female | 27                                  | 2  | lymph node, liver, pleura                 | carboplatin                | 1                     | 0.7          | 0.9         | 0.7                                                | 1376                  | NA                   |
| P11            | Chemorefractory                | 69  | Female | 20                                  | 3  | lymph node, bone, liver, pleura           | carboplatin                | 1                     | 2.8          | 5.3         | 0.5                                                | 204                   | NA                   |
| P12            | Chemorefractory                | 78  | Male   | 43                                  | 3  | liver, bone                               | carboplatin                | 1                     | 2.1          | 3.1         | 0.5                                                | 370                   | NA                   |
| P13            | Chemorefractory                | 80  | Male   | 30                                  | 2  | lymph node, liver                         | carboplatin                | 1                     | 1.0          | 1.5         | 1.0                                                | 1018                  | NA                   |
| P14            | Chemosensitive                 | 64  | Female | 100                                 | 2  | pleura                                    | carboplatin and etoposide  | 1                     | 1.1          | 1.1         | Non cancer related cause of death                  | 1356                  | NA                   |
| P15            | Chemosensitive                 | 70  | Male   | 130                                 | 2  | lymph node, pleural effusion              | carboplatin and etoposide  | 1                     | 3.7          | 4.0         | Non cancer related cause of death                  | 170                   | NA                   |
| P16            | Chemosensitive                 | 60  | Male   | Ex Smoker - pack years not recorded | 2  | lymph node, adrenal                       | carboplatin and etoposide  | 1                     | 6.0          | 11.3        | 4.6                                                | 237                   | NA                   |
| P17            | Chemosensitive                 | 82  | Female | Ex Smoker - pack years not recorded | 1  | lymph node, adrenal, spleen               | carboplatin and etoposide  | 1                     | 8.9          | 11.4        | 6.7                                                | 4061                  | NA                   |
| P18            | Chemosensitive                 | 71  | Male   | 40                                  | 1  | lymph node, bone, liver, adrenal          | carboplatin and etoposide  | 2                     | 8.9          | 16.1        | 6.6                                                | 377                   | NA                   |
| P19            | Chemosensitive                 | 67  | Female | 25                                  | 2  | lymph node, liver, adrenal, pancreas      | carboplatin                | 1                     | 1.7          | 1.7         | Non cancer related cause of death                  | 222                   | NA                   |
| P20            | Chemosensitive                 | 75  | Male   | 58                                  | 2  | bone marrow                               | carboplatin                | 1                     | 2.6          | 2.6         | Non cancer related cause of death                  | 23243                 | NA                   |
| P21            | Chemosensitive                 | 35  | Male   | 40                                  | 1  | lymph node, bone, liver, pleural effusion | carboplatin and etoposide* | 1                     | 5.2          | 6.7         | 3.1                                                | 109                   | NA                   |
| P22            | Chemosensitive                 | 68  | Female | 26                                  | 1  | lymph node, bone                          | carboplatin and etoposide  | 1                     | 5.1          | 8.7         | 3.2                                                | 2048                  | NA                   |
| P23            | Chemosensitive                 | 58  | Female | 80                                  | 1  | brain, adrenal                            | carboplatin and etoposide  | 1                     | 6.1          | 6.1         | 3.1                                                | 44                    | NA                   |
| P24            | Chemosensitive                 | 72  | Female | 40                                  | 1  | liver, lung                               | carboplatin and etoposide  | 1                     | 6.5          | 12.9        | 4.4                                                | 35                    | NA                   |
| P25            | Chemosensitive                 | 50  | Female | 25                                  | 2  | lymph node, bone, liver                   | carboplatin and etoposide* | 2                     | 9.1          | 15.7        | 7.0                                                | 669                   | NA                   |
| P26            | Chemosensitive                 | 68  | Female | 30                                  | 1  | lymph node, liver, lung                   | carboplatin and etoposide* | 1                     | 4.9          | 4.9         | Not progressed (>3.0 months)                       | 58                    | NA                   |
| P27            | Chemosensitive                 | 75  | Male   | 30                                  | 3  | lymph node, pleura                        | carboplatin                | 1                     | 1.0          | 1.0         | Non cancer related cause of death                  | 207                   | NA                   |
| P28            | Chemorefractory                | 74  | Male   | 59                                  | 1  | liver, pleural effusion                   | carboplatin and etoposide  | 1                     | 3.8          | 4.5         | 1.1                                                | 7687                  | NA                   |
| P29            | Chemorefractory                | 78  | Male   | 20                                  | 2  | bone, liver                               | carboplatin                | 1                     | 2.2          | 4.5         | 0.1                                                | 43                    | NA                   |
| P30            | Chemorefractory                | 66  | Female | 40                                  | 3  | lymph node, liver, adrenal                | carboplatin and etoposide  | 1                     | 4.2          | 4.5         | 1.8                                                | 1187                  | NA                   |
| P31            | Chemorefractory                | 72  | Female | 42                                  | 1  | liver                                     | carboplatin                | 1                     | 1.6          | 3.6         | 0.0                                                | 11                    | NA                   |
| CDX1           | Chemosensitive                 | 55  | Male   | 40                                  | 2  | lymph node, bone                          | carboplatin and etoposide* | 1                     | 7.3          | 7.3         | 7.3                                                | 458                   | NA                   |
| CDX3           | Chemosensitive                 | 70  | Male   | 58                                  | 3  | lymph node                                | carboplatin and etoposide* | 1                     | 8            | 9.8         | 7.1                                                | 507                   | NA                   |
| CDX7           | Chemorefractory                | 69  | Female | 40                                  | 2  | bone, liver, lung                         | carboplatin                | 1                     | 4.9          | 5.2         | 2.3                                                | 901                   | NA                   |
| CDX8           | Chemorefractory                | 63  | Female | 42                                  | 3  | bone, liver                               | carboplatin                | 1                     | 5.1          | 6.1         | 2.3                                                | 388                   | NA                   |
| CDX9           | Chemosensitive                 | 69  | Female | 40                                  | 2  | lymph node, bone, liver, adrenal          | carboplatin and etoposide  | 1                     | 1.7          | 1.7         | Non cancer related cause of death                  | 4660                  | NA                   |
| CDX10          | Chemosensitive                 | 75  | Male   | 55                                  | 2  | lymph node, bone, liver                   | carboplatin and etoposide  | 2                     | 10.4         | 18          | 8.3                                                | 160                   | NA                   |

\* Thoracic radiotherapy given post chemotherapy response assessment in the absence of progression

## Supplementary Table ST2.

| Segment    | Chromosome | Gene Count | Ave copy number Sensitive | Ave copy number Refractory |
|------------|------------|------------|---------------------------|----------------------------|
| Profile-1  | 20         | 37         | 2                         | 3                          |
| Profile-2  | 6          | 258        | 2                         | 3                          |
| Profile-3  | 19         | 257        | 2                         | 3                          |
| Profile-4  | 14         | 6          | 2                         | 3                          |
| Profile-5  | 9          | 11         | 3                         | 2                          |
| Profile-6  | 11         | 33         | 3                         | 2                          |
| Profile-7  | 18         | 256        | 3                         | 2                          |
| Profile-8  | 18         | 18         | 4                         | 2                          |
| Profile-9  | 5          | 22         | 3                         | 2                          |
| Profile-10 | 16         | 57         | 3                         | 1                          |
| Profile-11 | 16         | 155        | 3                         | 2                          |
| Profile-12 | 16         | 258        | 2                         | 1                          |
| Profile-13 | 4          | 29         | 1                         | 2                          |
| Profile-14 | 17         | 3          | 1                         | 2                          |
| Profile-15 | 3          | 38         | 2                         | 1                          |
| Profile-16 | 13         | 3          | 2                         | 1                          |

# Supplementary Table ST3.

| Patient | Clinical classification | CTC CNA classification | Total number CTCs | Number CTCs correctly classified | Number CTCs incorrectly classified | % CTC Heterogeneity |                                  |
|---------|-------------------------|------------------------|-------------------|----------------------------------|------------------------------------|---------------------|----------------------------------|
| P1      | Chemosensitive          | Chemosensitive         | 7                 | 7                                | 0                                  | 0                   | Homogeneous CTC Classification   |
| P2      | Chemosensitive          | Chemosensitive         | 9                 | 9                                | 0                                  | 0                   |                                  |
| P3      | Chemosensitive          | Chemosensitive         | 5                 | 5                                | 0                                  | 0                   |                                  |
| P4      | Chemosensitive          | Chemosensitive         | 4                 | 4                                | 0                                  | 0                   |                                  |
| P5      | Chemosensitive          | Chemosensitive         | 11                | 11                               | 0                                  | 0                   |                                  |
| P7      | Chemosensitive          | Chemosensitive         | 8                 | 8                                | 0                                  | 0                   |                                  |
| P14     | Chemosensitive          | Chemosensitive         | 6                 | 6                                | 0                                  | 0                   |                                  |
| P15     | Chemosensitive          | Chemosensitive         | 8                 | 8                                | 0                                  | 0                   |                                  |
| P16     | Chemosensitive          | Chemosensitive         | 5                 | 5                                | 0                                  | 0                   |                                  |
| P17     | Chemosensitive          | Chemosensitive         | 7                 | 7                                | 0                                  | 0                   |                                  |
| P18     | Chemosensitive          | Chemorefractory        | 6                 | 0                                | 6                                  | 0                   |                                  |
| P24     | Chemosensitive          | Chemosensitive         | 4                 | 4                                | 0                                  | 0                   |                                  |
| P8      | Chemorefractory         | Chemorefractory        | 9                 | 9                                | 0                                  | 0                   |                                  |
| P9      | Chemorefractory         | Chemorefractory        | 6                 | 6                                | 0                                  | 0                   |                                  |
| P10     | Chemorefractory         | Chemorefractory        | 3                 | 3                                | 0                                  | 0                   |                                  |
| P11     | Chemorefractory         | Chemorefractory        | 7                 | 7                                | 0                                  | 0                   |                                  |
| P12     | Chemorefractory         | Chemorefractory        | 7                 | 7                                | 0                                  | 0                   |                                  |
| P13     | Chemorefractory         | Chemorefractory        | 7                 | 7                                | 0                                  | 0                   |                                  |
| P28     | Chemorefractory         | Chemosensitive         | 5                 | 0                                | 5                                  | 0                   |                                  |
| P6      | Chemosensitive          | Chemosensitive         | 5                 | 4                                | 1                                  | 20                  | Heterogeneous CTC Classification |
| P19     | Chemosensitive          | Chemosensitive         | 5                 | 3                                | 2                                  | 40                  |                                  |
| P20     | Chemosensitive          | Chemosensitive         | 5                 | 3                                | 2                                  | 40                  |                                  |
| P21     | Chemosensitive          | Chemosensitive         | 9                 | 6                                | 3                                  | 33                  |                                  |
| P22     | Chemosensitive          | Chemosensitive         | 9                 | 8                                | 1                                  | 11                  |                                  |
| P23     | Chemosensitive          | Chemosensitive         | 6                 | 4                                | 2                                  | 33                  |                                  |
| P25     | Chemosensitive          | Chemosensitive         | 13                | 9                                | 4                                  | 31                  |                                  |
| P26     | Chemosensitive          | Chemorefractory        | 4                 | 1                                | 3                                  | 25                  |                                  |
| P27     | Chemosensitive          | Chemosensitive         | 7                 | 6                                | 1                                  | 14                  |                                  |
| P29     | Chemorefractory         | Chemorefractory        | 3                 | 2                                | 1                                  | 33                  |                                  |
| P30     | Chemorefractory         | Chemorefractory        | 7                 | 4                                | 3                                  | 43                  |                                  |
| P31     | Chemorefractory         | Chemorefractory        | 3                 | 2                                | 1                                  | 33                  |                                  |

## Supplementary Table ST4.

|                                               | CTC CNA Classifier |                 |
|-----------------------------------------------|--------------------|-----------------|
|                                               | Chemosensitive     | Chemorefractory |
| Age at baseline, years, median (range)        | 67.5 (35 - 82)     | 71 (61 - 80)    |
| Mann-Whitney's P                              | p=0.098            |                 |
| Sex                                           |                    |                 |
| Female                                        | 11                 | 6               |
| Male                                          | 9                  | 5               |
| Fisher's exact P                              | p=1                |                 |
| Performance Status                            |                    |                 |
| Group 1: 1                                    | 8                  | 4               |
| Group 2: 2-3                                  | 12                 | 7               |
| Fisher's exact P                              | p=1                |                 |
| Treatment                                     |                    |                 |
| Carboplatin                                   | 5                  | 6               |
| Carboplatin and etoposide                     | 15                 | 5               |
| Fisher's exact P                              | p=0.1318           |                 |
| Number Metastatic Sites, rounded mean (range) | 2 (1-4)            | 3 (1-4)         |
| Mann-Whitney's P                              | p=0.088            |                 |
| CTC count at baseline, rounded median (range) | 414 (27-23243)     | 377 (11-20815)  |
| Mann-Whitney's P                              | P=0.855            |                 |

# Supplementary Table ST5.

| Chemosensitive Baseline |                 |                   |                    |                 |                   |                    | Chemorefractory Baseline |                 |                   |                    |                 |
|-------------------------|-----------------|-------------------|--------------------|-----------------|-------------------|--------------------|--------------------------|-----------------|-------------------|--------------------|-----------------|
| Pre-Treatment           |                 |                   | Relapse            |                 |                   | Pre-Treatment      |                          |                 |                   |                    |                 |
| Patient                 | Cellular Sample | Clinical response | Predicted response | Cellular Sample | Clinical Response | Predicted response | Patient                  | Cellular Sample | Clinical response | Predicted response |                 |
| P1                      | P1 CTC-01       | Chemosensitive    | Chemosensitive     | P1 CTC-09       | Relapse           | Chemosensitive     | P8                       | P8 CTC-01       | Chemorefractory   | Chemorefractory    |                 |
|                         | P1 CTC-02       | Chemosensitive    | Chemosensitive     | P1 CTC-10       | Relapse           | Chemosensitive     |                          | P8 CTC-02       | Chemorefractory   | Chemorefractory    |                 |
|                         | P1 CTC-03       | Chemosensitive    | Chemosensitive     | P1 CTC-11       | Relapse           | Chemosensitive     |                          | P8 CTC-03       | Chemorefractory   | Chemorefractory    |                 |
|                         | P1 CTC-04       | Chemosensitive    | Chemosensitive     | P1 CTC-12       | Relapse           | Chemosensitive     |                          | P8 CTC-04       | Chemorefractory   | Chemorefractory    |                 |
|                         | P1 CTC-05       | Chemosensitive    | Chemosensitive     | P1 CTC-13       | Relapse           | Chemosensitive     |                          | P8 CTC-05       | Chemorefractory   | Chemorefractory    |                 |
|                         | P1 CTC-06       | Chemosensitive    | Chemosensitive     | P1 CTC-14       | Relapse           | Chemosensitive     |                          | P8 CTC-06       | Chemorefractory   | Chemorefractory    |                 |
|                         | P1 CTC-07       | Chemosensitive    | Chemosensitive     | P1 CTC-15       | Relapse           | Chemosensitive     |                          | P8 CTC-07       | Chemorefractory   | Chemorefractory    |                 |
| P2                      | P2 CTC-01       | Chemosensitive    | Chemosensitive     | P2 CTC-16       | Relapse           | Chemosensitive     | P8 CTC-08                | Chemorefractory | Chemorefractory   |                    |                 |
|                         | P2 CTC-02       | Chemosensitive    | Chemosensitive     | P2 CTC-17       | Relapse           | Chemosensitive     | P8 CTC-09                | Chemorefractory | Chemorefractory   |                    |                 |
|                         | P2 CTC-03       | Chemosensitive    | Chemosensitive     | P2 CTC-18       | Relapse           | Chemosensitive     | P9 CTC-01                | Chemorefractory | Chemorefractory   |                    |                 |
|                         | P2 CTC-04       | Chemosensitive    | Chemosensitive     | P2 CTC-07       | Relapse           | Chemosensitive     | P9 CTC-02                | Chemorefractory | Chemorefractory   |                    |                 |
|                         | P2 CTC-05       | Chemosensitive    | Chemosensitive     | P2 CTC-08       | Relapse           | Chemosensitive     | P9 CTC-03                | Chemorefractory | Chemorefractory   |                    |                 |
|                         | P2 CTC-06       | Chemosensitive    | Chemosensitive     | P2 CTC-09       | Relapse           | Chemosensitive     | P9 CTC-04                | Chemorefractory | Chemorefractory   |                    |                 |
|                         | P2 CTC-07       | Chemosensitive    | Chemosensitive     | P2 CTC-10       | Relapse           | Chemosensitive     | P9 CTC-05                | Chemorefractory | Chemorefractory   |                    |                 |
| P3                      | P3 CTC-01       | Chemosensitive    | Chemosensitive     | P3 CTC-11       | Relapse           | Chemosensitive     | P10                      | P10 CTC-01      | Chemorefractory   | Chemorefractory    |                 |
|                         | P3 CTC-02       | Chemosensitive    | Chemosensitive     | P3 CTC-12       | Relapse           | Chemosensitive     | P10 CTC-02               | Chemorefractory | Chemorefractory   |                    |                 |
|                         | P3 CTC-03       | Chemosensitive    | Chemosensitive     | P3 CTC-13       | Relapse           | Chemosensitive     | P10 CTC-03               | Chemorefractory | Chemorefractory   |                    |                 |
|                         | P3 CTC-04       | Chemosensitive    | Chemosensitive     | P3 CTC-07       | Relapse           | Chemorefractory    | P11 CTC-01               | Chemorefractory | Chemorefractory   |                    |                 |
|                         | P3 CTC-05       | Chemosensitive    | Chemosensitive     | P3 CTC-08       | Relapse           | Chemorefractory    | P11 CTC-02               | Chemorefractory | Chemorefractory   |                    |                 |
| P4                      | P4 CTC-01       | Chemosensitive    | Chemosensitive     | P4 CTC-09       | Relapse           | Chemorefractory    | P11                      | P11 CTC-03      | Chemorefractory   | Chemorefractory    |                 |
|                         | P4 CTC-02       | Chemosensitive    | Chemosensitive     | P4 CTC-10       | Relapse           | Chemorefractory    |                          | P11 CTC-04      | Chemorefractory   | Chemorefractory    |                 |
|                         | P4 CTC-03       | Chemosensitive    | Chemosensitive     | P4 CTC-11       | Relapse           | Chemorefractory    |                          | P11 CTC-05      | Chemorefractory   | Chemorefractory    |                 |
|                         | P4 CTC-04       | Chemosensitive    | Chemosensitive     | P4 CTC-12       | Relapse           | Chemorefractory    |                          | P11 CTC-06      | Chemorefractory   | Chemorefractory    |                 |
|                         | P5              | P5 CTC-01         | Chemosensitive     | Chemosensitive  | P5 CTC-13         | Relapse            |                          | Chemorefractory | P12 CTC-07        | Chemorefractory    | Chemorefractory |
|                         |                 | P5 CTC-02         | Chemosensitive     | Chemosensitive  | P5 CTC-14         | Relapse            |                          | Chemorefractory | P12 CTC-05        | Chemorefractory    | Chemorefractory |
|                         |                 | P5 CTC-03         | Chemosensitive     | Chemosensitive  | P5 CTC-15         | Relapse            |                          | Chemorefractory | P12 CTC-06        | Chemorefractory    | Chemorefractory |
| P5 CTC-04               |                 | Chemosensitive    | Chemosensitive     | P5 CTC-16       | Relapse           | Chemorefractory    | P12 CTC-07               | Chemorefractory | Chemorefractory   |                    |                 |
| P5 CTC-05               |                 | Chemosensitive    | Chemosensitive     | P5 CTC-17       | Relapse           | Chemorefractory    | P12 CTC-08               | Chemorefractory | Chemorefractory   |                    |                 |
| P5 CTC-06               |                 | Chemosensitive    | Chemosensitive     | P5 CTC-18       | Relapse           | Chemorefractory    | P12 CTC-09               | Chemorefractory | Chemorefractory   |                    |                 |
| P5 CTC-07               |                 | Chemosensitive    | Chemosensitive     | P5 CTC-19       | Relapse           | Chemorefractory    | P12 CTC-10               | Chemorefractory | Chemorefractory   |                    |                 |
| P5 CTC-08               | Chemosensitive  | Chemosensitive    | P5 CTC-20          | Relapse         | Chemorefractory   | P13 CTC-01         | Chemorefractory          | Chemorefractory |                   |                    |                 |
| P5 CTC-09               | Chemosensitive  | Chemosensitive    | P5 CTC-21          | Relapse         | Chemorefractory   | P13 CTC-02         | Chemorefractory          | Chemorefractory |                   |                    |                 |
| P5 CTC-10               | Chemosensitive  | Chemosensitive    | P5 CTC-22          | Relapse         | Chemorefractory   | P13 CTC-03         | Chemorefractory          | Chemorefractory |                   |                    |                 |
| P5 CTC-11               | Chemosensitive  | Chemosensitive    | P5 CTC-23          | Relapse         | Chemorefractory   |                    |                          |                 |                   |                    |                 |
